# Supplementary material for: The Excitotoxin Quinolinic Acid Induces Tau Phosphorylation in Human Neurons
Source: PubMed Central journal article supplement (PMC2709912; doi:10.1371/journal.pone.0006344), 2009-07-22

### Supplementary figure 3

QA (red; Alexa 647) and tau (AT8; green; Alexa 594) colocalisation in a neuron containing neurofibrillary tangle. and QA. Optical sections were taken through the neuron at 2  $\mu\text{m}$  intervals.

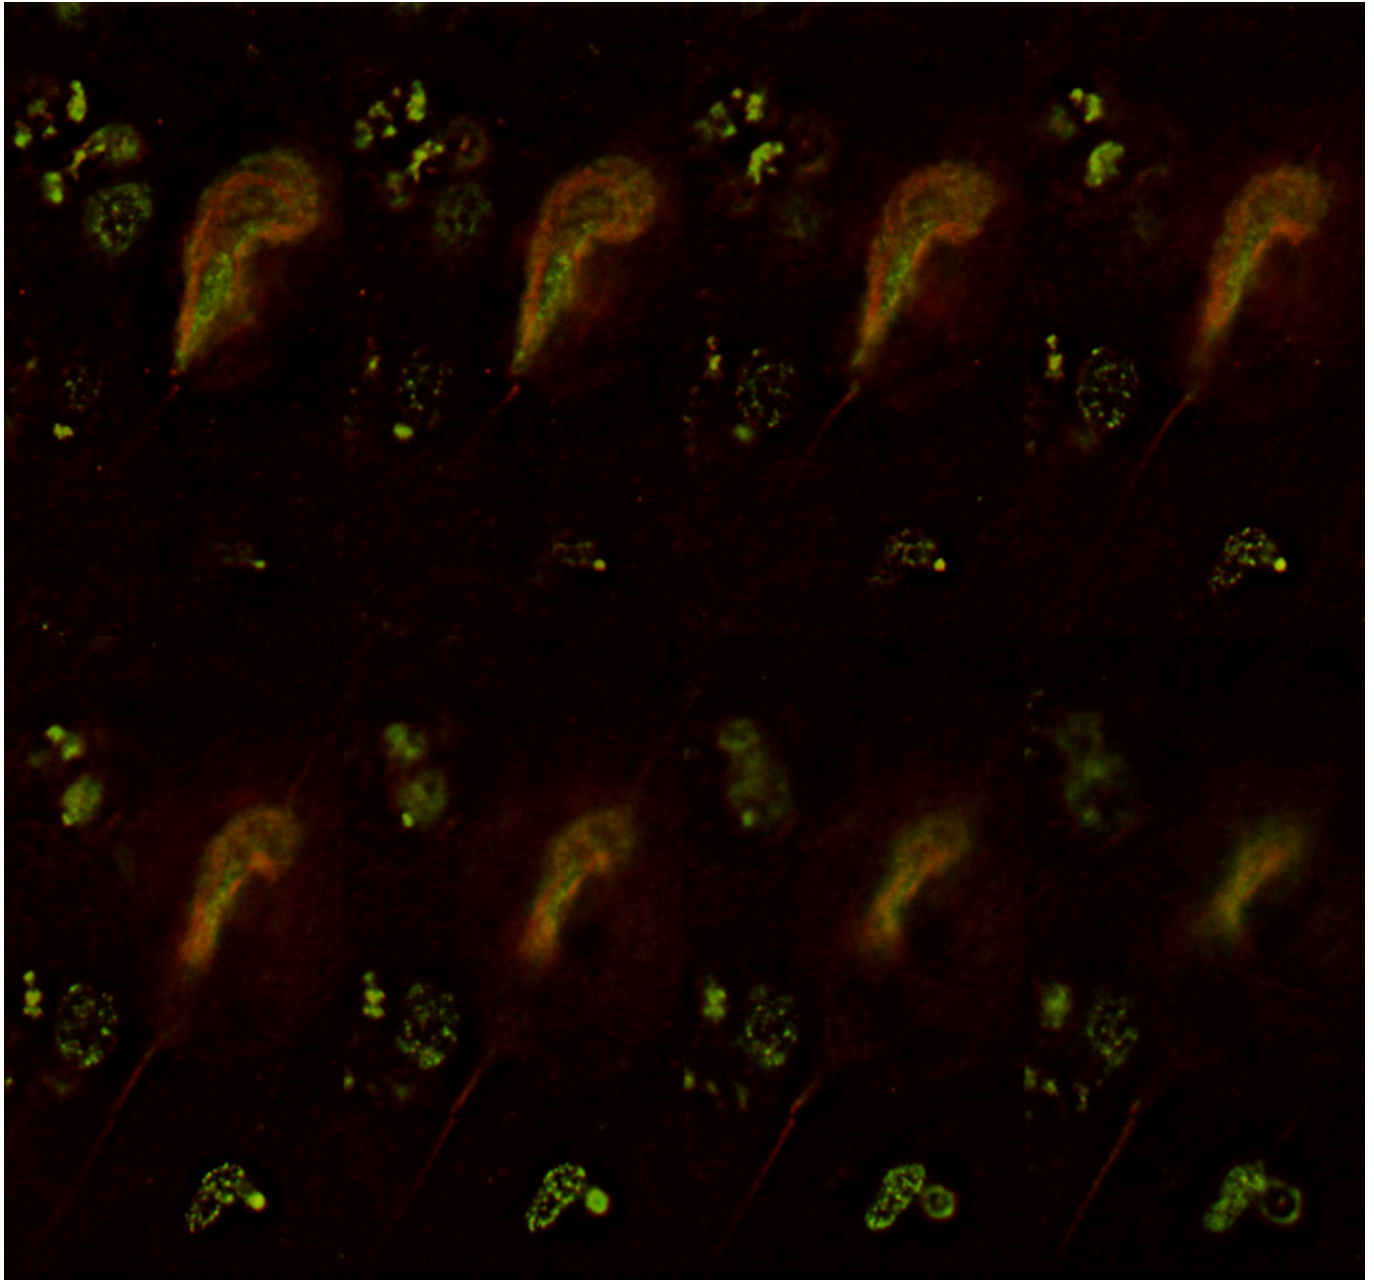

Supplement: pone.0006344.s003.pdf [file pone.0006344.s003.pdf]
